# Supplementary material for: Motivations for Adolescent COVID-19 Vaccination: A Comparative Study of Adolescent and Caregiver Perspectives in Germany
Source: MDPI journal article supplement (doi:10.3390/children10121890), 2023-12-06
Supplement: s1 [file s1]

## Supplementary Information

### Motivations for Adolescent COVID-19 Vaccination: A Comparative Study of Adolescent and Caregiver Perspectives in Germany

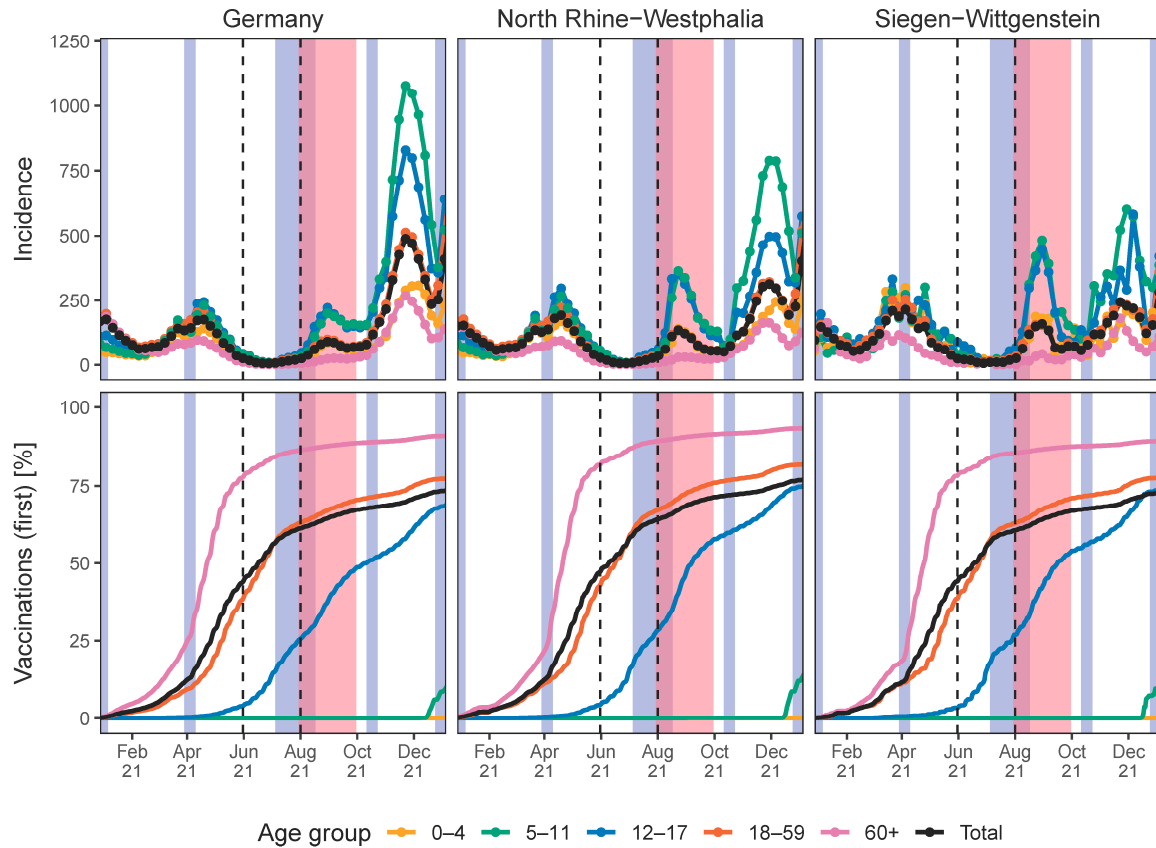

**Figure S1.** Seven-day SARS-CoV-2 incidence per 100,000 inhabitants and the fraction of vaccinated individuals (first vaccine dose) in Germany, federal state of North Rhine-Westphalia, and the Siegen-Wittgenstein study region stratified by age group. School holidays are marked in blue, the study time frame is marked in red. Dashed lines indicate the date of approval of SARS-CoV-2 vaccinations for adolescents by the EMA and the resolution of a law stating that individuals entering Germany from countries with high infection numbers or VOC require a certificate of vaccination, recent recovery from COVID-19, or a negative test result.

**Table S1.** Reasons for receiving a COVID-19 vaccination as answered by the adolescents.

| Reason for vaccination   |                  | First generation migration background |             |             |
|--------------------------|------------------|---------------------------------------|-------------|-------------|
|                          |                  | all                                   | without     | with        |
|                          | Total (n)        | 1378                                  | 1148        | 230         |
| Protection of own family | missing          | 53 (3.8%)                             | 45 (3.9%)   | 8 (3.5%)    |
|                          | totally agree    | 797 (57.8%)                           | 670 (58.4%) | 127 (55.2%) |
|                          | rather agree     | 181 (13.1%)                           | 143 (12.5%) | 38 (16.5%)  |
|                          | partly           | 209 (15.2%)                           | 178 (15.5%) | 31 (13.5%)  |
|                          | rather disagree  | 61 (4.4%)                             | 46 (4.0%)   | 15 (6.5%)   |
|                          | totally disagree | 77 (5.6%)                             | 66 (5.7%)   | 11 (4.8%)   |
| Self-protection          | missing          | 34 (2.5%)                             | 28 (2.4%)   | 6 (2.6%)    |
|                          | totally agree    | 969 (70.3%)                           | 818 (71.3%) | 151 (65.7%) |
|                          | rather agree     | 165 (12.0%)                           | 134 (11.7%) | 31 (13.5%)  |
|                          | partly           | 128 (9.3%)                            | 101 (8.8%)  | 27 (11.7%)  |

|                    |                  |             |             |             |
|--------------------|------------------|-------------|-------------|-------------|
| Travelling         | rather disagree  | 40 (2.9%)   | 32 (2.8%)   | 8 (3.5%)    |
|                    | totally disagree | 42 (3.0%)   | 35 (3.0%)   | 7 (3.0%)    |
|                    | missing          | 80 (5.8%)   | 70 (6.1%)   | 10 (4.3%)   |
|                    | totally agree    | 495 (35.9%) | 406 (35.4%) | 89 (38.7%)  |
|                    | rather agree     | 134 (9.7%)  | 104 (9.1%)  | 30 (13.0%)  |
|                    | partly           | 248 (18.0%) | 207 (18.0%) | 41 (17.8%)  |
|                    | rather disagree  | 205 (14.9%) | 178 (15.5%) | 27 (11.7%)  |
|                    | totally disagree | 216 (15.7%) | 183 (15.9%) | 33 (14.3%)  |
| Leisure activities | missing          | 38 (2.8%)   | 29 (2.5%)   | 9 (3.9%)    |
|                    | totally agree    | 873 (63.4%) | 720 (62.7%) | 153 (66.5%) |
|                    | rather agree     | 186 (13.5%) | 162 (14.1%) | 24 (10.4%)  |
|                    | partly           | 144 (10.4%) | 127 (11.1%) | 17 (7.4%)   |
|                    | rather disagree  | 69 (5.0%)   | 58 (5.1%)   | 11 (4.8%)   |
|                    | totally disagree | 68 (4.9%)   | 52 (4.5%)   | 16 (7.0%)   |

**Table S2.** Reasons for adolescents receiving a COVID-19 vaccination as answered by the parents, stratified by migration background.

| Reason for vaccination       | First-generation migration background |             |                |            |                |
|------------------------------|---------------------------------------|-------------|----------------|------------|----------------|
|                              | Total (n)                             | all<br>820  | without<br>654 | with<br>57 | unknown<br>109 |
| Protection of the adolescent | missing                               | 9 (1.1%)    | 6 (0.9%)       | 1 (1.8%)   | 2 (1.8%)       |
|                              | totally agree                         | 704 (85.9%) | 561 (85.8%)    | 49 (86.0%) | 94 (86.2%)     |
|                              | rather agree                          | 49 (6.0%)   | 39 (6.0%)      | 3 (5.3%)   | 7 (6.4%)       |
|                              | partly                                | 40 (4.9%)   | 36 (5.5%)      | 2 (3.5%)   | 2 (1.8%)       |
|                              | rather disagree                       | 9 (1.1%)    | 6 (0.9%)       | 2 (3.5%)   | 1 (0.9%)       |
|                              | totally disagree                      | 9 (1.1%)    | 6 (0.9%)       | 0 (0.0%)   | 3 (2.8%)       |
| Protection of the family     | missing                               | 18 (2.2%)   | 15 (2.3%)      | 1 (1.8%)   | 2 (1.8%)       |
|                              | totally agree                         | 554 (67.6%) | 437 (66.8%)    | 38 (66.7%) | 79 (72.5%)     |
|                              | rather agree                          | 68 (8.3%)   | 56 (8.6%)      | 6 (10.5%)  | 6 (5.5%)       |
|                              | partly                                | 109 (13.3%) | 90 (13.8%)     | 5 (8.8%)   | 14 (12.8%)     |
|                              | rather disagree                       | 39 (4.8%)   | 31 (4.7%)      | 3 (5.3%)   | 5 (4.6%)       |
|                              | totally disagree                      | 32 (3.9%)   | 25 (3.8%)      | 4 (7.0%)   | 3 (2.8%)       |
| Protection of the parents    | missing                               | 22 (2.7%)   | 18 (2.8%)      | 1 (1.8%)   | 3 (2.8%)       |
|                              | totally agree                         | 372 (45.4%) | 287 (43.9%)    | 33 (57.9%) | 52 (47.7%)     |
|                              | rather agree                          | 60 (7.3%)   | 51 (7.8%)      | 4 (7.0%)   | 5 (4.6%)       |
|                              | partly                                | 109 (13.3%) | 88 (13.5%)     | 6 (10.5%)  | 15 (13.8%)     |
|                              | rather disagree                       | 117 (14.3%) | 96 (14.7%)     | 3 (5.3%)   | 18 (16.5%)     |
|                              | totally disagree                      | 140 (17.1%) | 114 (17.4%)    | 10 (17.5%) | 16 (14.7%)     |
| Travelling                   | missing                               | 23 (2.8%)   | 20 (3.1%)      | 1 (1.8%)   | 2 (1.8%)       |
|                              | totally agree                         | 361 (44.0%) | 274 (41.9%)    | 35 (61.4%) | 52 (47.7%)     |
|                              | rather agree                          | 85 (10.4%)  | 69 (10.6%)     | 6 (10.5%)  | 10 (9.2%)      |
|                              | partly                                | 124 (15.1%) | 107 (16.4%)    | 3 (5.3%)   | 14 (12.8%)     |
|                              | rather disagree                       | 105 (12.8%) | 90 (13.8%)     | 5 (8.8%)   | 10 (9.2%)      |
|                              | totally disagree                      | 122 (14.9%) | 94 (14.4%)     | 7 (12.3%)  | 21 (19.3%)     |
| Leisure activities           | missing                               | 8 (1.0%)    | 6 (0.9%)       | 0 (0.0%)   | 2 (1.8%)       |
|                              | totally agree                         | 615 (75.0%) | 488 (74.6%)    | 46 (80.7%) | 81 (74.3%)     |
|                              | rather agree                          | 96 (11.7%)  | 78 (11.9%)     | 7 (12.3%)  | 11 (10.1%)     |
|                              | partly                                | 65 (7.9%)   | 53 (8.1%)      | 2 (3.5%)   | 10 (9.2%)      |
|                              | rather disagree                       | 20 (2.4%)   | 17 (2.6%)      | 1 (1.8%)   | 2 (1.8%)       |

|                           |                  |             |             |            |            |
|---------------------------|------------------|-------------|-------------|------------|------------|
| Schooling of the<br>child | totally disagree | 16 (2.0%)   | 12 (1.8%)   | 1 (1.8%)   | 3 (2.8%)   |
|                           | missing          | 8 (1.0%)    | 6 (0.9%)    | 0 (0.0%)   | 2 (1.8%)   |
|                           | totally agree    | 699 (85.2%) | 560 (85.6%) | 44 (77.2%) | 95 (87.2%) |
|                           | rather agree     | 59 (7.2%)   | 45 (6.9%)   | 8 (14.0%)  | 6 (5.5%)   |
|                           | partly           | 31 (3.8%)   | 24 (3.7%)   | 4 (7.0%)   | 3 (2.8%)   |
|                           | rather disagree  | 10 (1.2%)   | 9 (1.4%)    | 0 (0.0%)   | 1 (0.9%)   |
|                           | totally disagree | 13 (1.6%)   | 10 (1.5%)   | 1 (1.8%)   | 2 (1.8%)   |
